# Supplementary material for: Enhanced OER catalytic activity of single metal atoms supported by the pentagonal NiN2 monolayer: insight from density functional theory calculations
Source: Royal Society of Chemistry journal article supplement (doi:10.1039/d3cp05464k), 2024-01-01
Supplement: d3cp05464k2.pdf [file d3cp05464k2.pdf]

## Table of Contents Entry

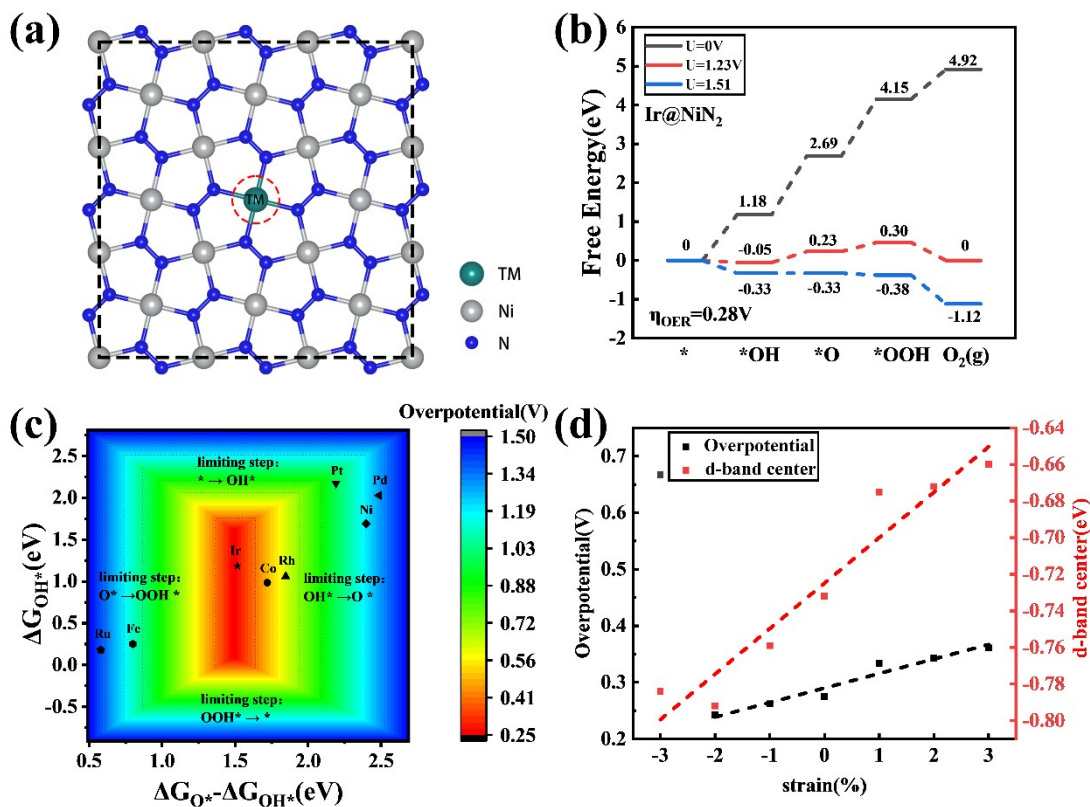

Single Ir atom embedded into NiN<sub>2</sub> monolayer exhibit high OER catalytic activity with 0.28 eV overpotential. The OER catalytic activity of Ir atom embedded into NiN<sub>2</sub> monolayer can further enhanced by strain.
